# Supplementary material for: A set of microsatellite markers to differentiate Plasmodium falciparum progeny of four genetic crosses
Source: Springer Nature journal article supplement (doi:10.1186/s12936-018-2210-z), 2018-02-02

# Additional file 4. Mixed Sample Electropherograms

Marker  
**TAA87**

DNA ratio 803:GB4  
**5:95**

Microsatellite Region Sizes  
**803—109bp GB4—94bp**

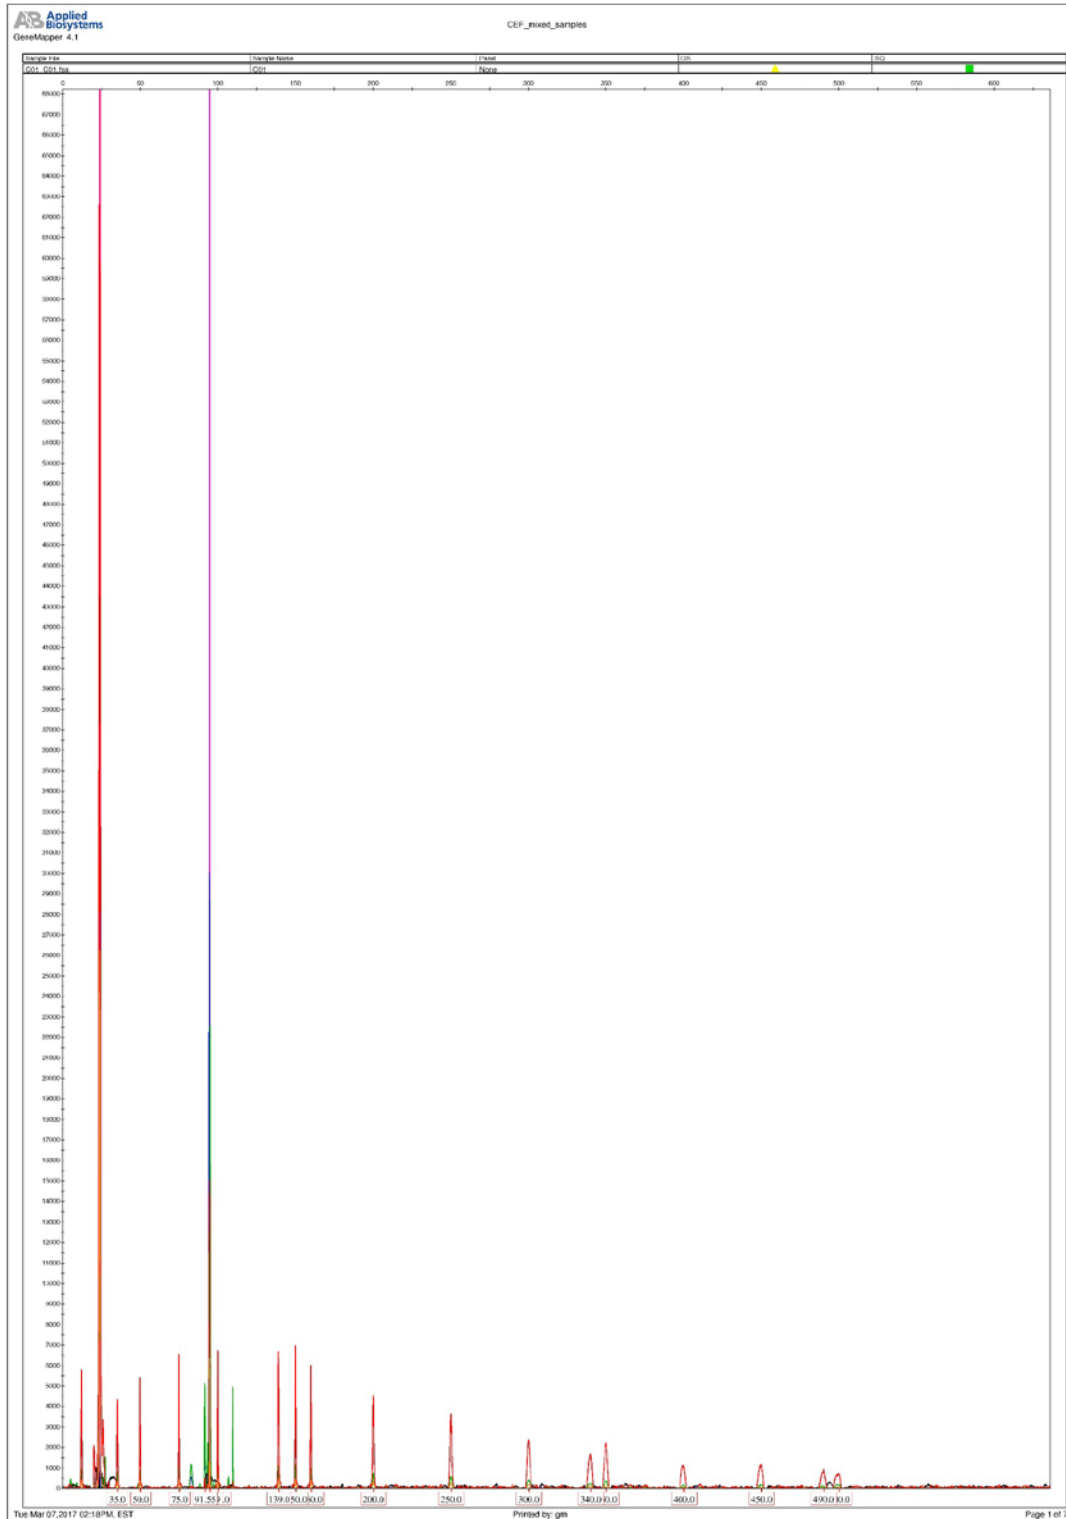

# Additional file 4. Mixed Sample Electropherograms

Marker  
**TAA87**

DNA ratio 803:GB4  
**10:90**

Microsatellite Region Sizes  
**803—109bp GB4—94bp**

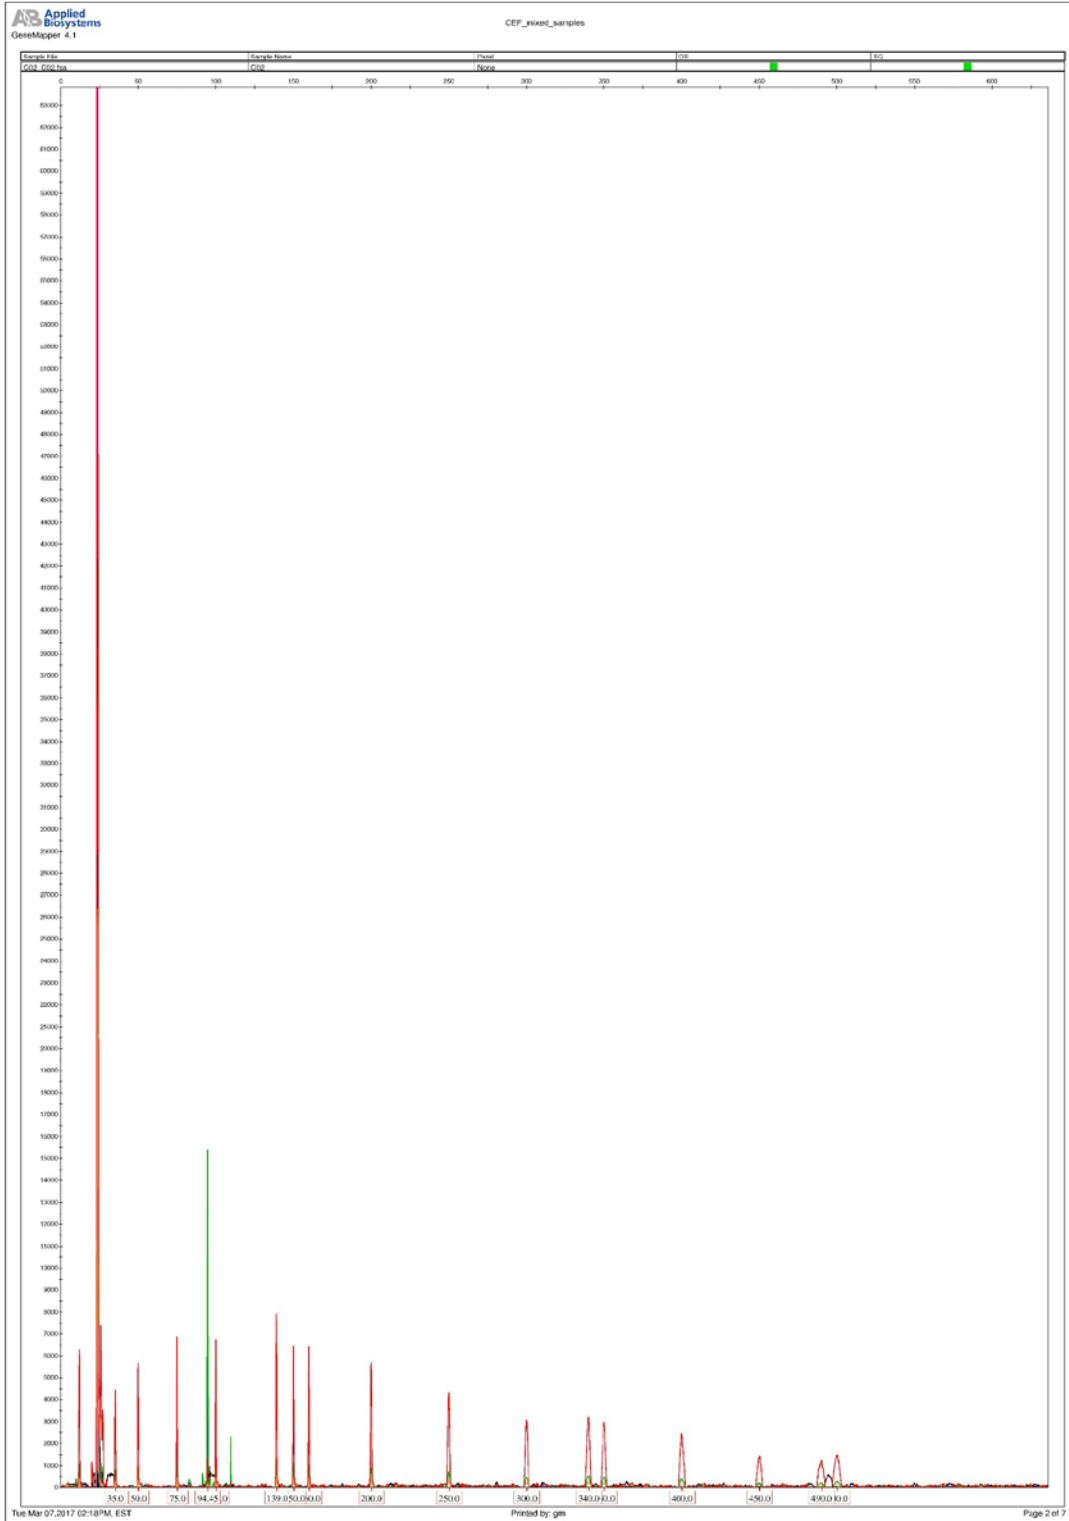

Additional file 4. Mixed Sample Electropherograms

Marker  
TAA87

DNA ratio 803:GB4  
20:80

Microsatellite Region Sizes  
803—109bp GB4—94bp

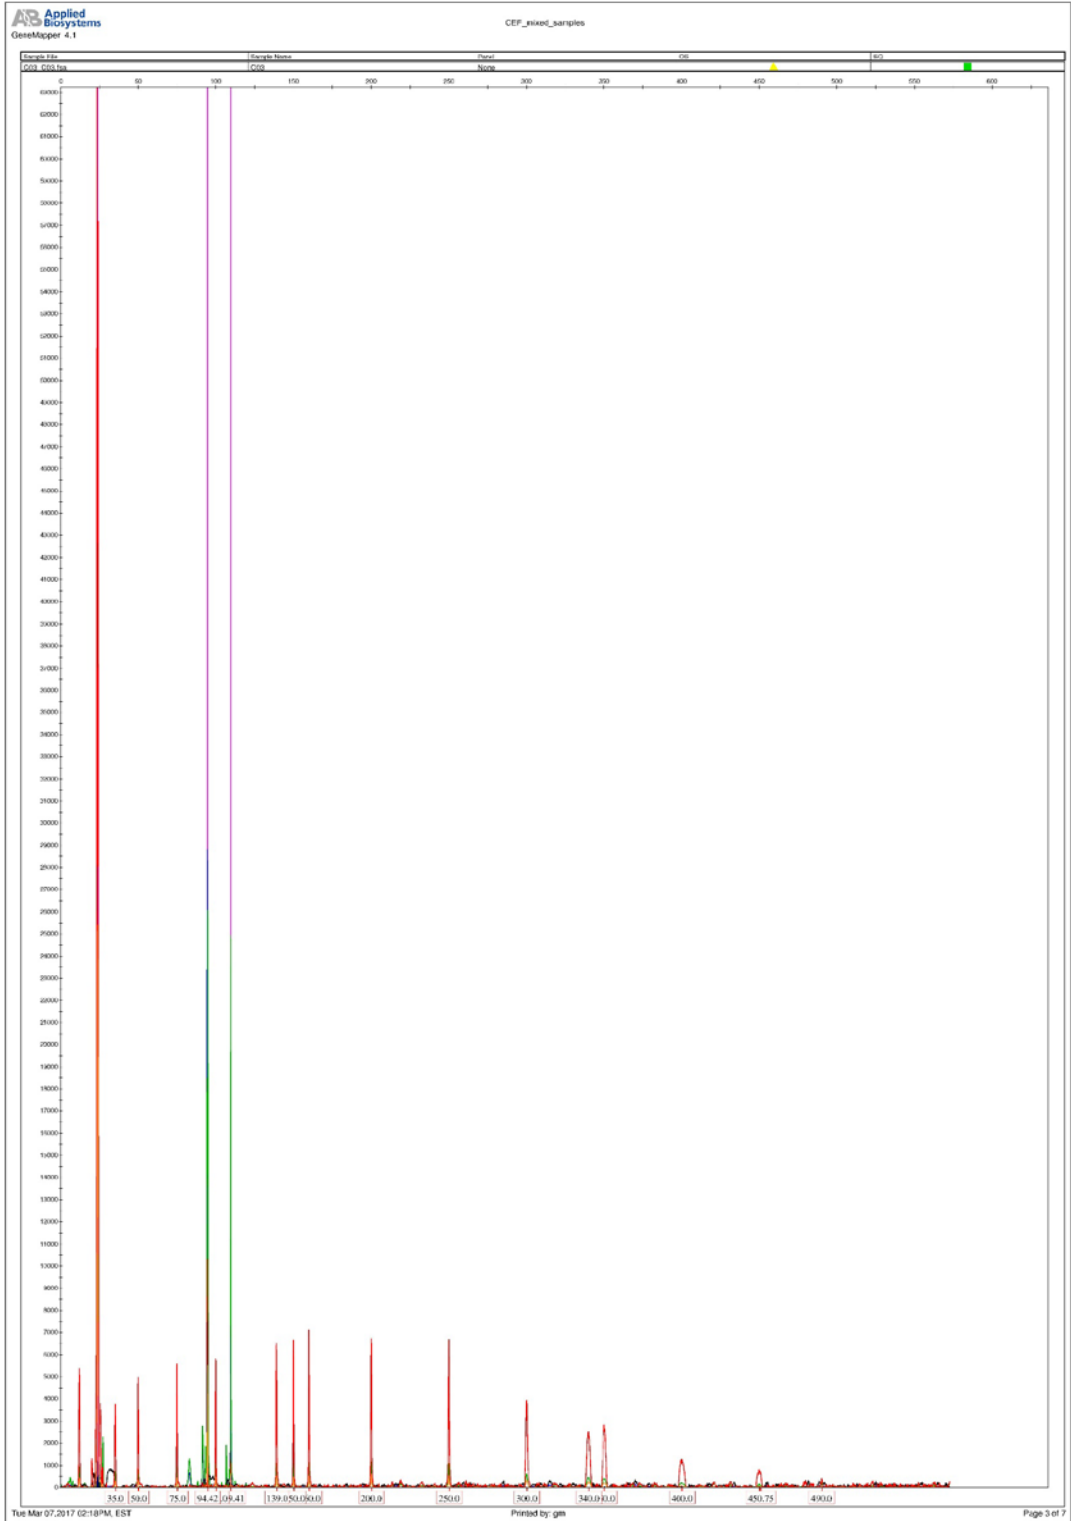

# Additional file 4. Mixed Sample Electropherograms

Marker  
**TAA87**

DNA ratio 803:GB4  
**50:50**

Microsatellite Region Sizes  
**803—109bp GB4—94bp**

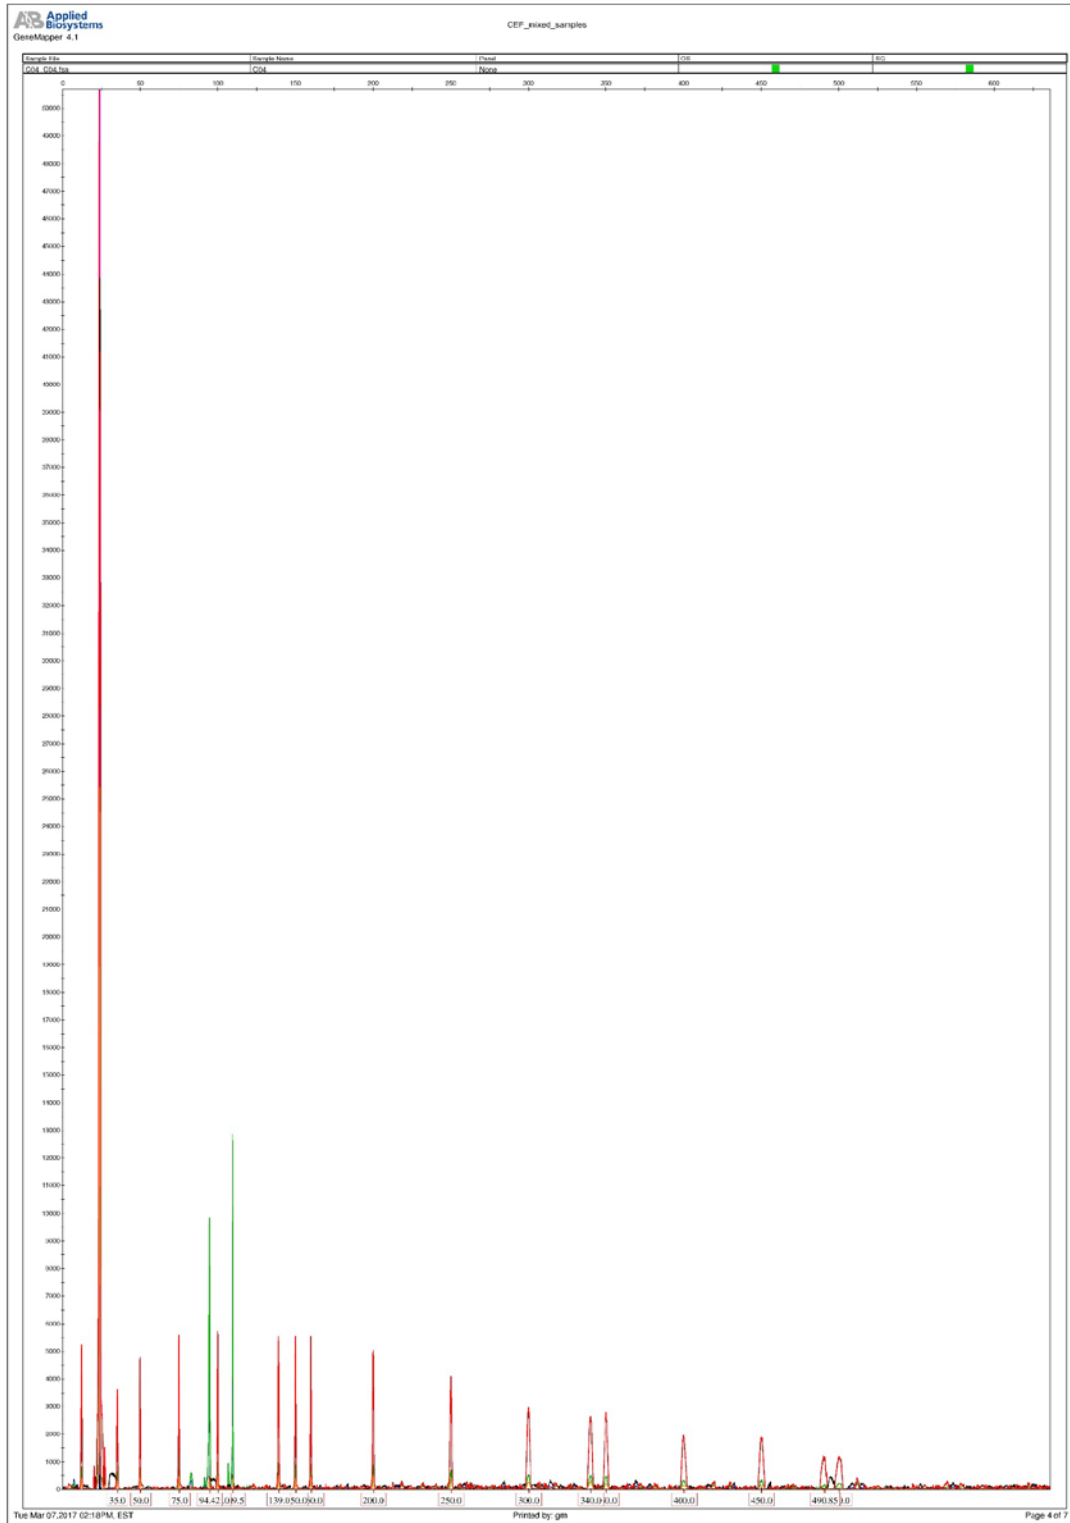

Additional file 4. Mixed Sample Electropherograms

Marker  
TAA87

DNA ratio 803:GB4  
80:20

Microsatellite Region Sizes  
803—109bp GB4—94bp

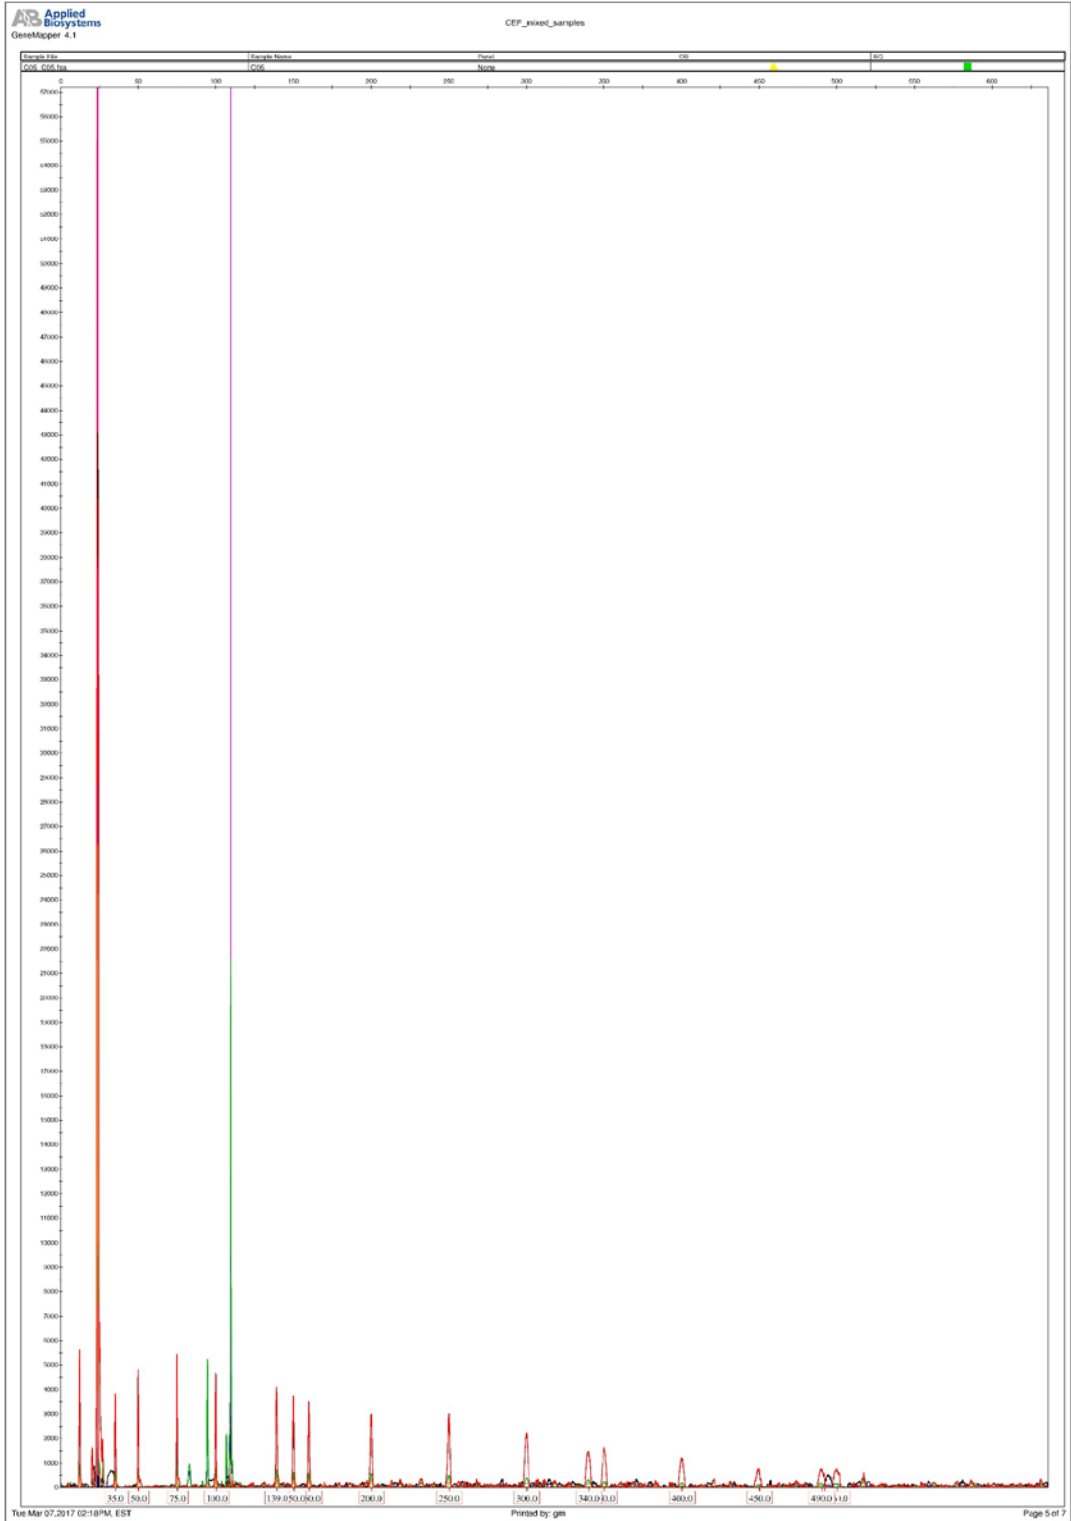

# Additional file 4. Mixed Sample Electropherograms

Marker  
**TAA87**

DNA ratio 803:GB4  
**90:10**

Microsatellite Region Sizes  
**803—109bp GB4—94bp**

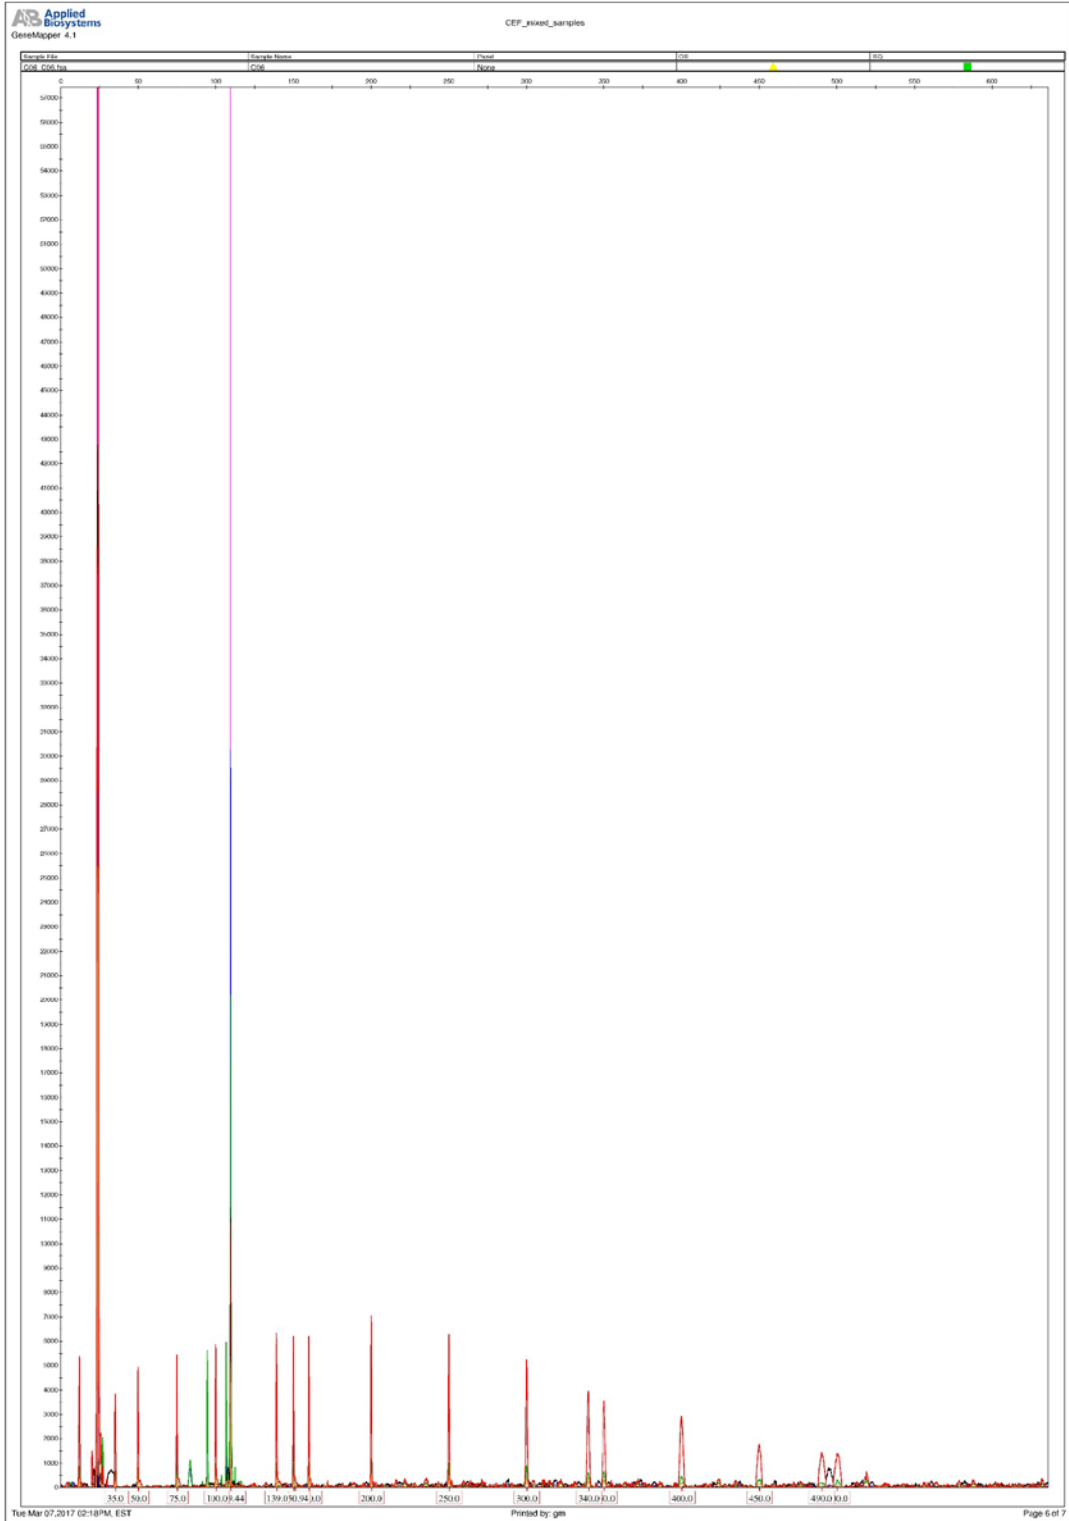

# Additional file 4. Mixed Sample Electropherograms

Marker  
**TAA87**

DNA ratio 803:GB4  
**95:5**

Microsatellite Region Sizes  
**803—109bp GB4—94bp**

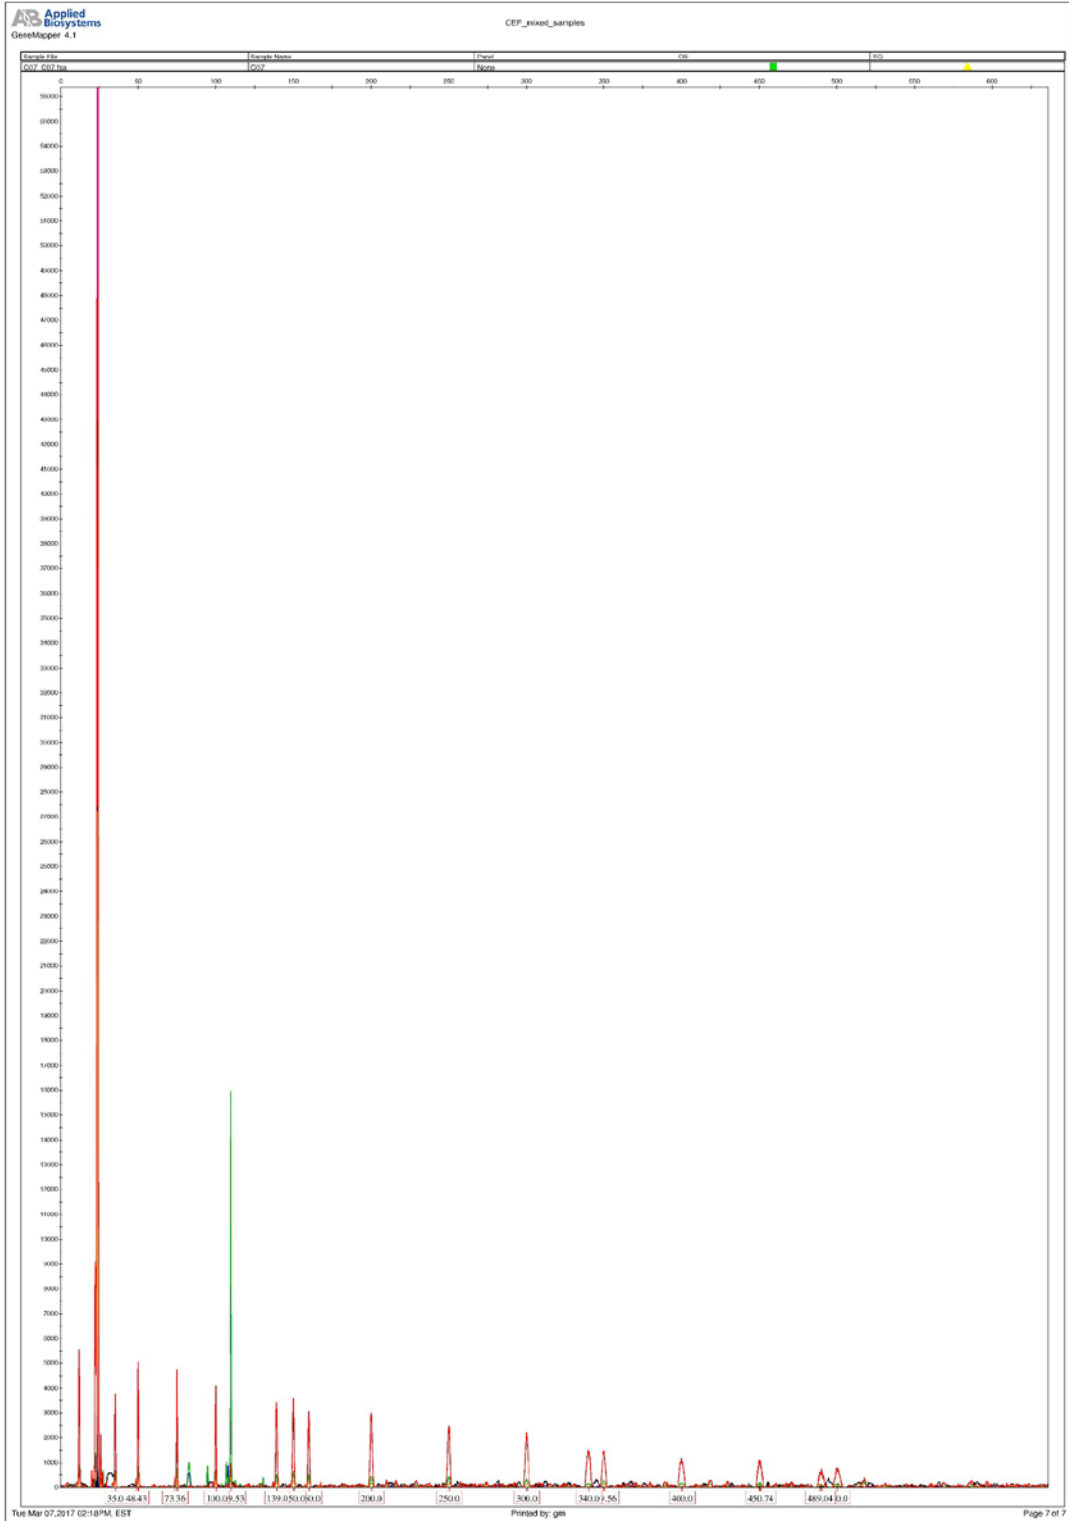

# Additional file 4. Mixed Sample Electropherograms

Marker  
TA127

DNA ratio 803:GB4  
5:95

Microsatellite Region Sizes  
803—132bp GB4—118bp

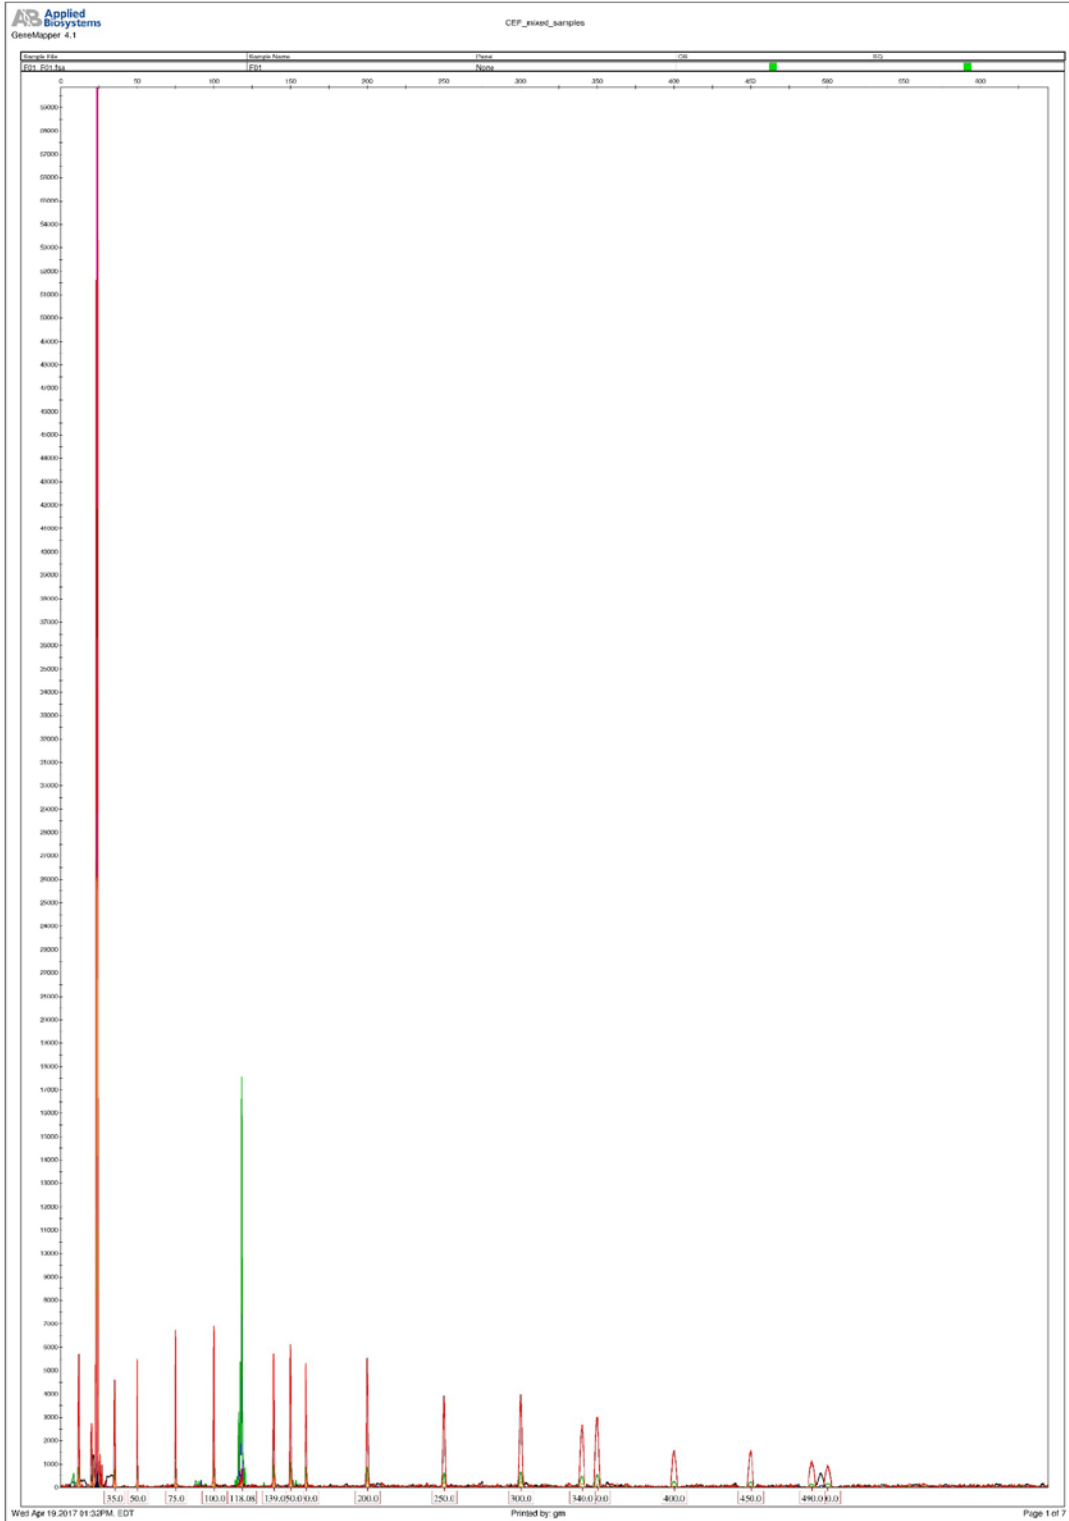



# Additional file 4. Mixed Sample Electropherograms

Marker  
**TA127**

DNA ratio 803:GB4  
**10:90**

Microsatellite Region Sizes  
**803—132bp GB4—118bp**

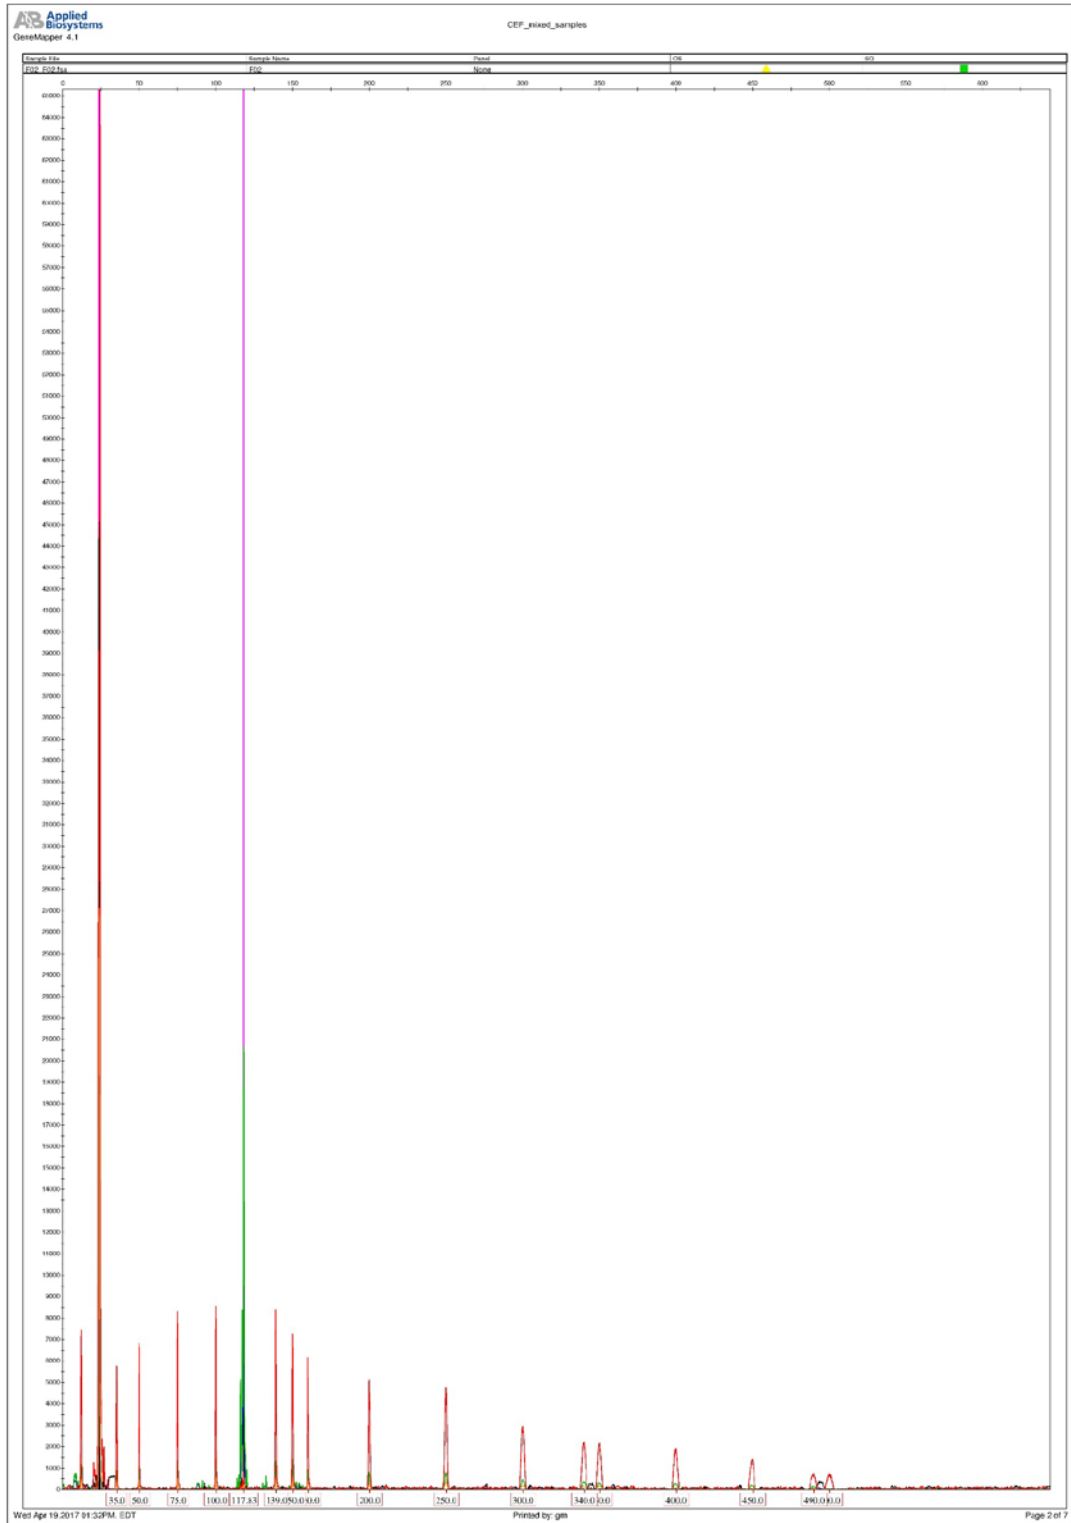

# Additional file 4. Mixed Sample Electropherograms

Marker  
**TA127**

DNA ratio 803:GB4  
**20:80**

Microsatellite Region Sizes  
**803—132bp GB4—118bp**

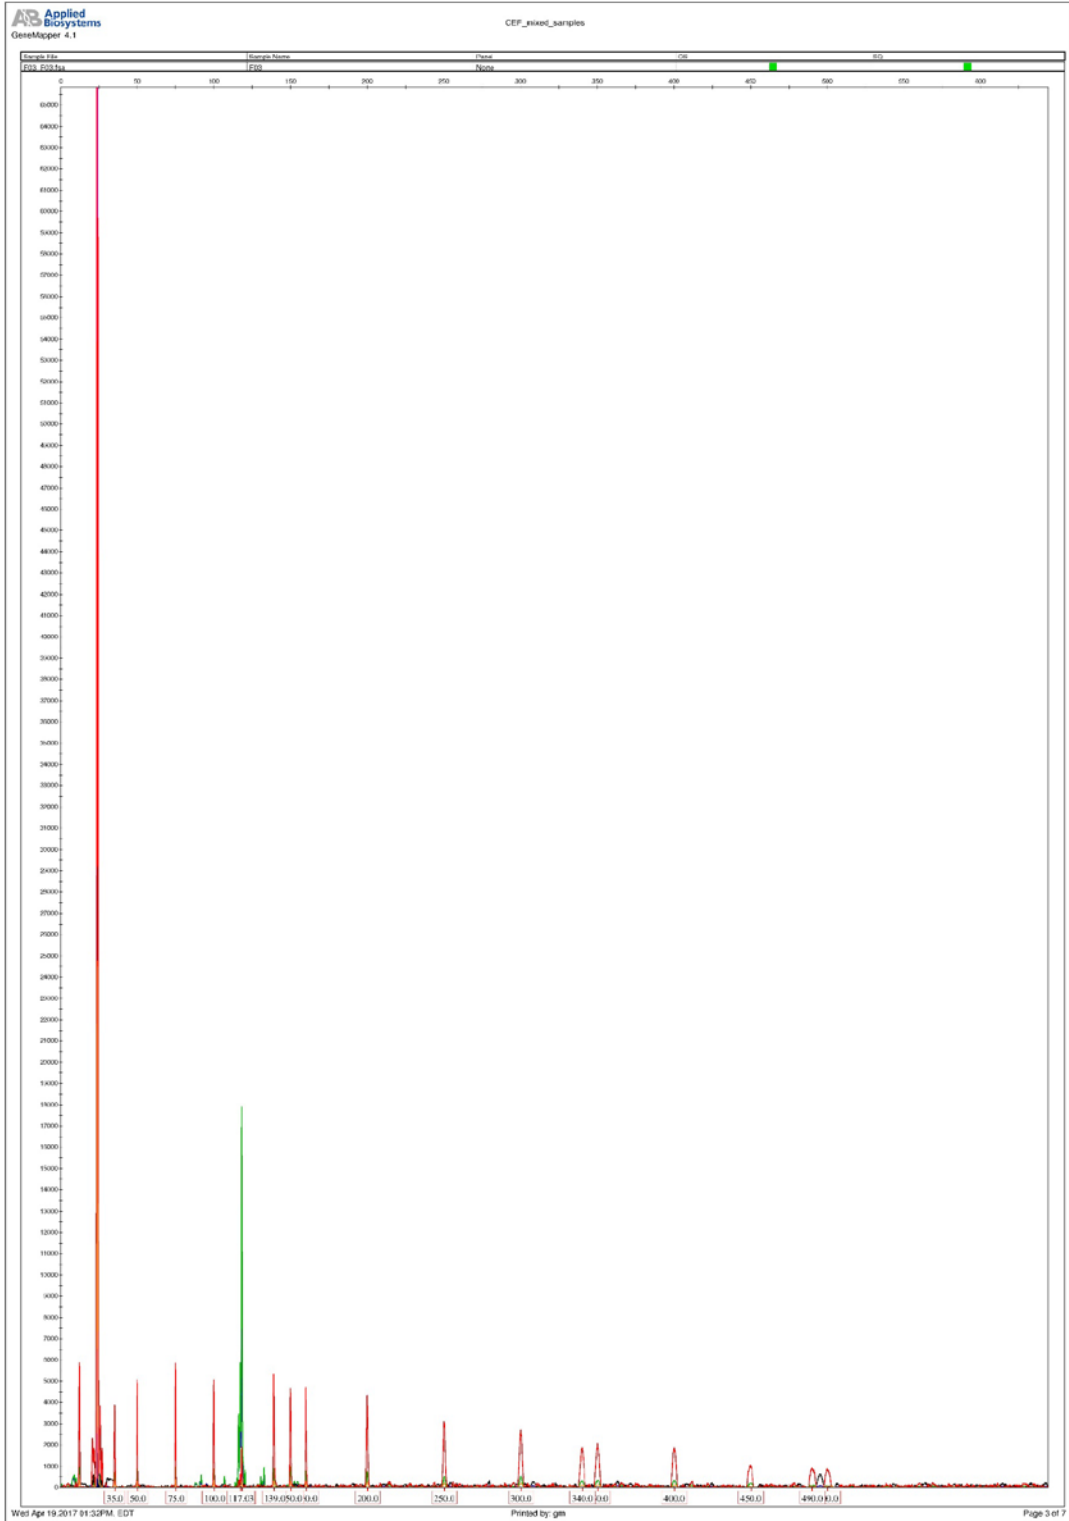

# Additional file 4. Mixed Sample Electropherograms

Marker  
**TA127**

DNA ratio 803:GB4  
**50:50**

Microsatellite Region Sizes  
**803—132bp GB4—118bp**

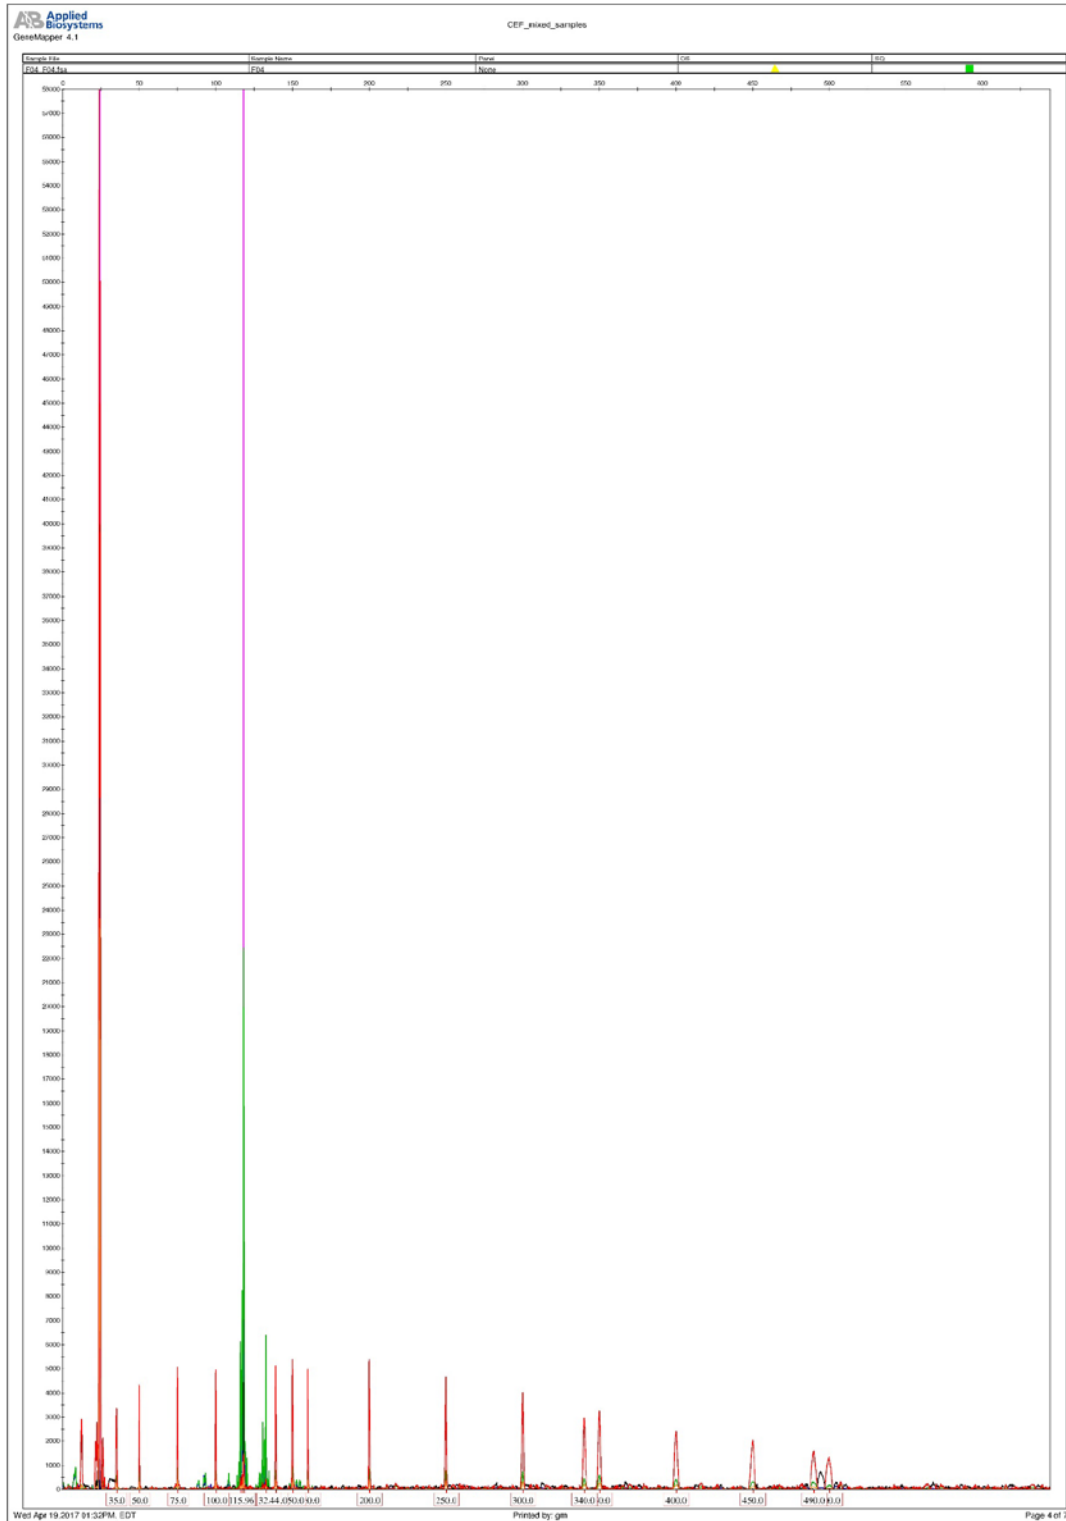

# Additional file 4. Mixed Sample Electropherograms

Marker  
**TA127**

DNA ratio 803:GB4  
**80:20**

Microsatellite Region Sizes  
**803—132bp GB4—118bp**

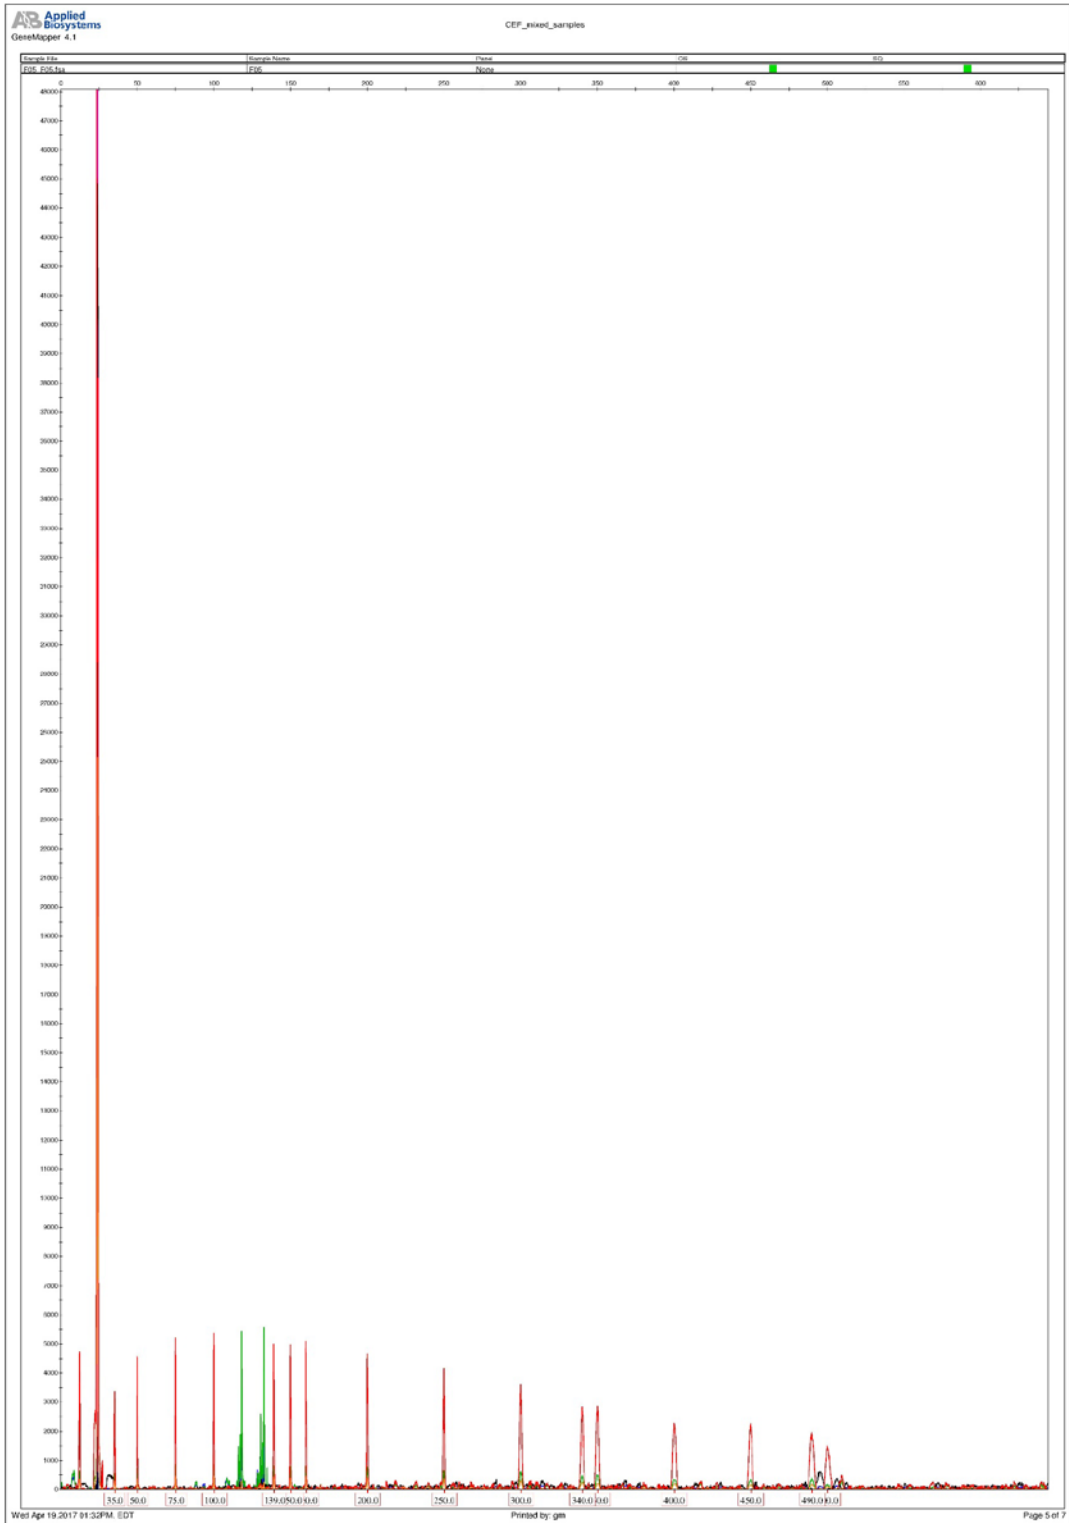

# Additional file 4. Mixed Sample Electropherograms

Marker  
**TA127**

DNA ratio 803:GB4  
**90:10**

Microsatellite Region Sizes  
**803—132bp GB4—118bp**

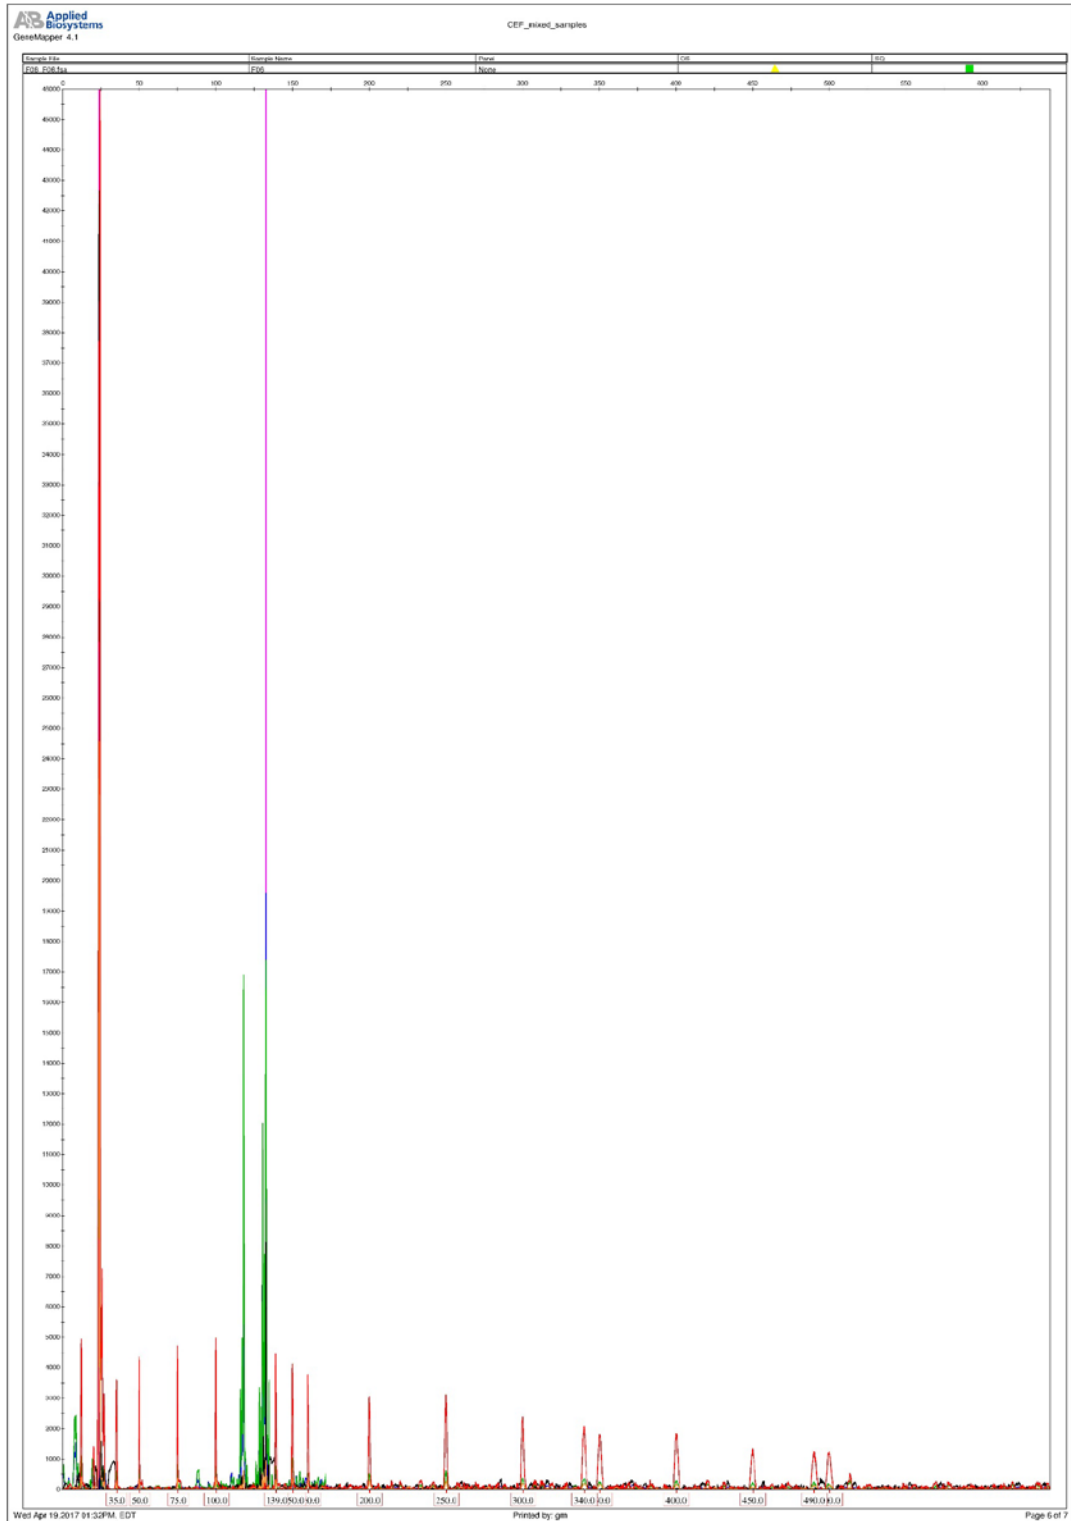

# Additional file 4. Mixed Sample Electropherograms

Marker  
**TA127**

DNA ratio 803:GB4  
**95:5**

Microsatellite Region Sizes  
**803—132bp GB4—118bp**

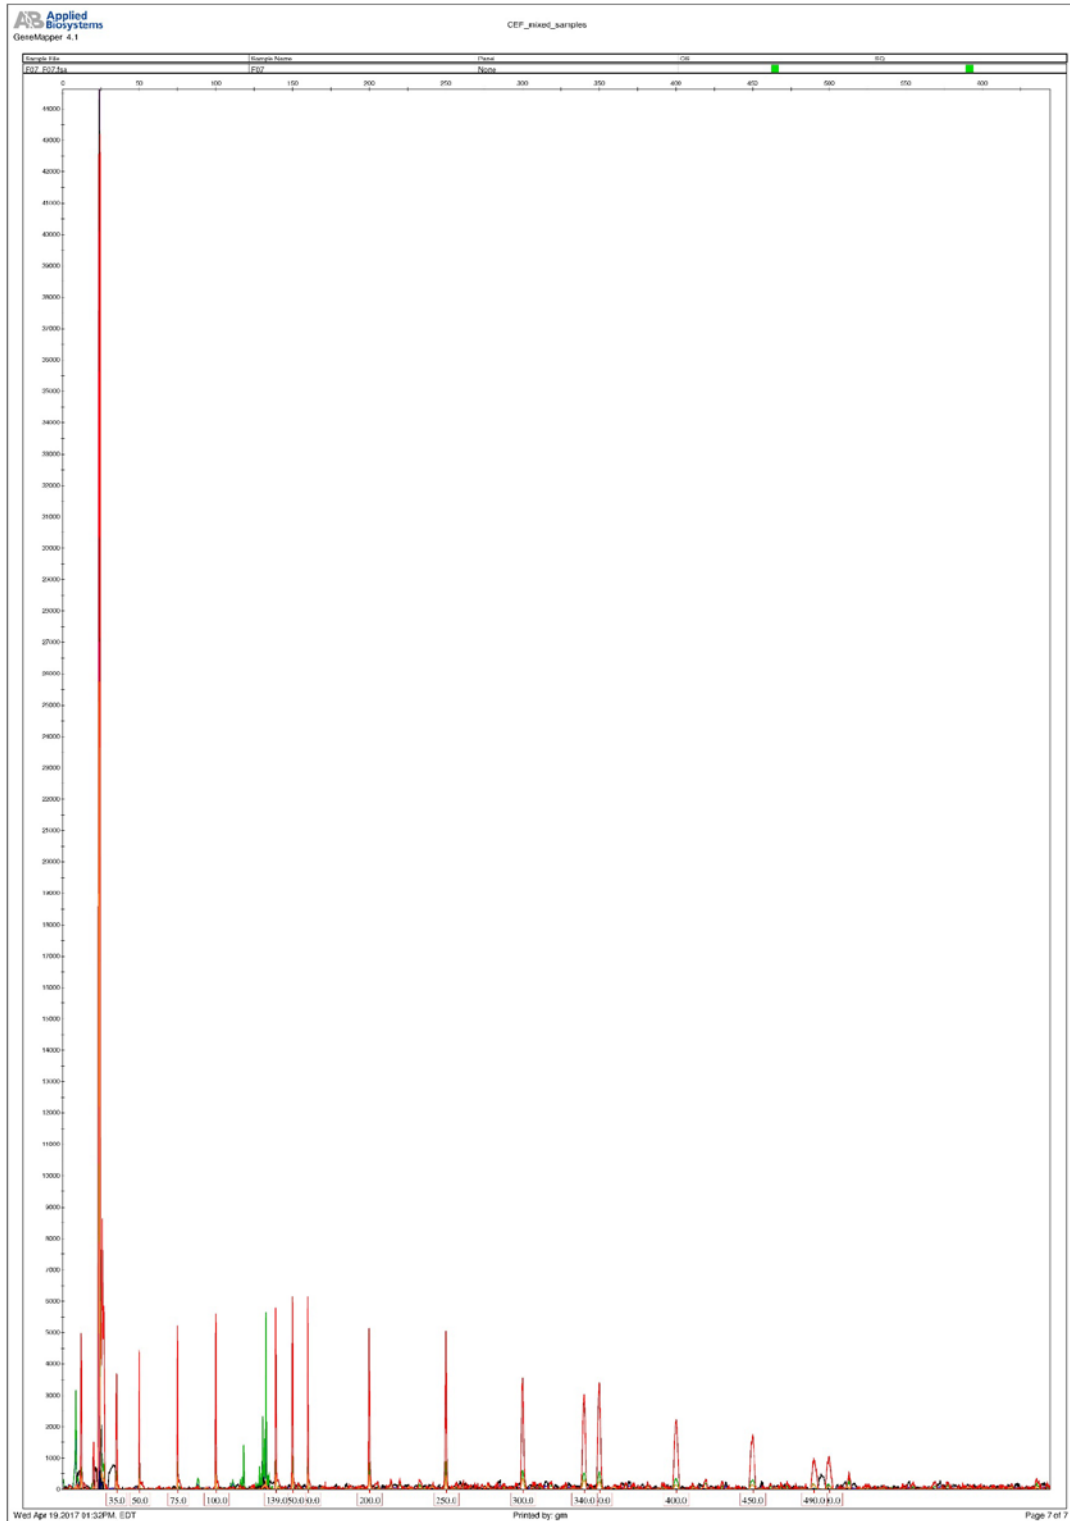

Supplement: MOESM4 [file 15436092]
